# Supplementary material
Source: Springer Nature journal article supplement (https://www.springermedizin.de/resource/supplementary/12969_2012_949_MOESM6_ESM.pdf/9588828)

A

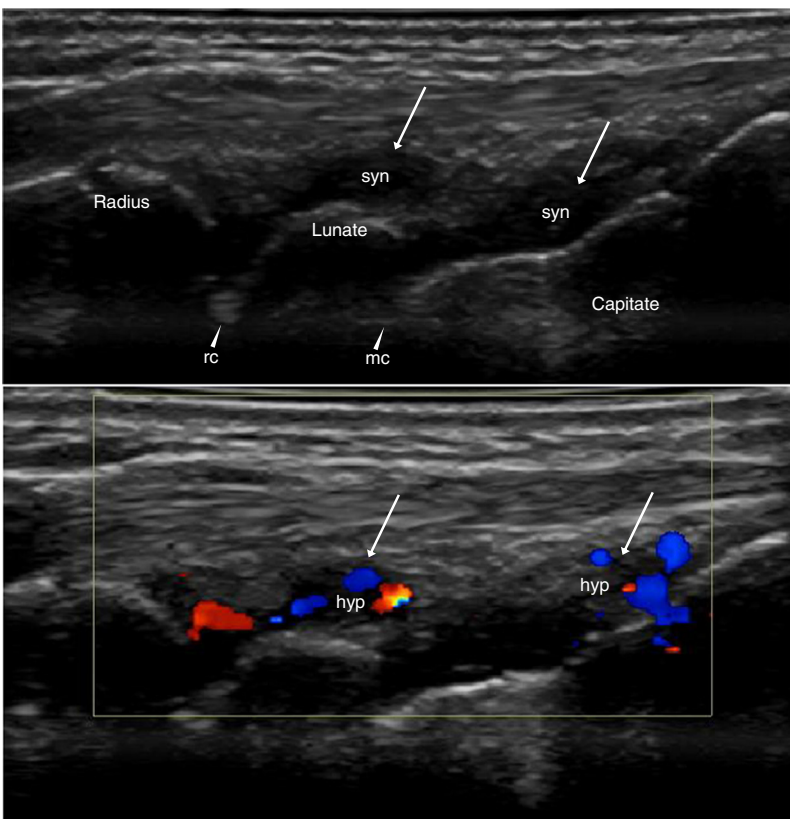

B

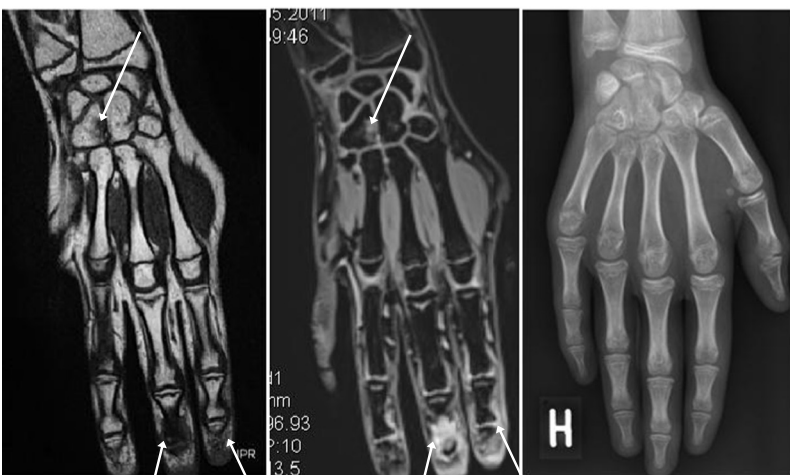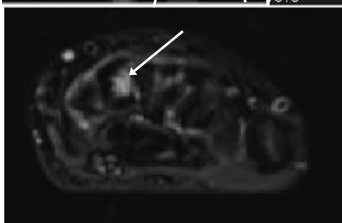

Supplement: MOESM6 [file 9588828]
